# Supplementary material for: Functional and Evolutionary Significance of Human MicroRNA Seed Region Mutations
Source: PubMed Central journal article supplement (PMC4264867; doi:10.1371/journal.pone.0115241), 2014-12-12
Supplement: pone.0115241.s001.pdf [file pone.0115241.s001.pdf]

a

miR-195 uAGCAGCAcagaaaauuuggc

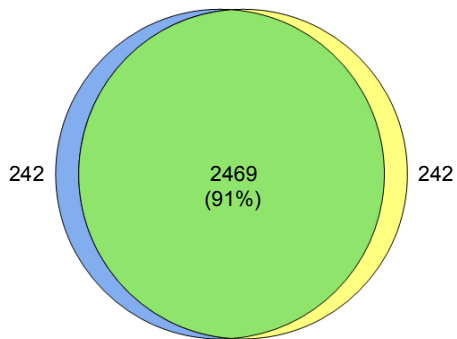

miR-16 uAGCAGCAcguaaaauuuggcg

b

miR-195 uAGCAGCAcagaaaauuuggc

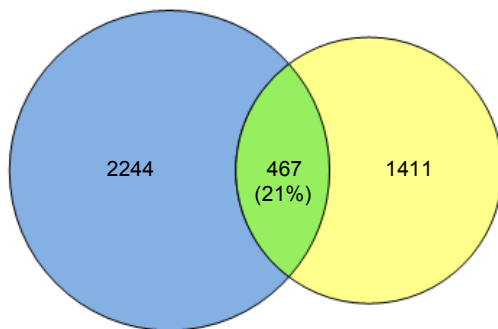

miR-29a uAGCACCAucugaaaucggguua

c

miR-195 uAGCAGCAcagaaaauuuggc

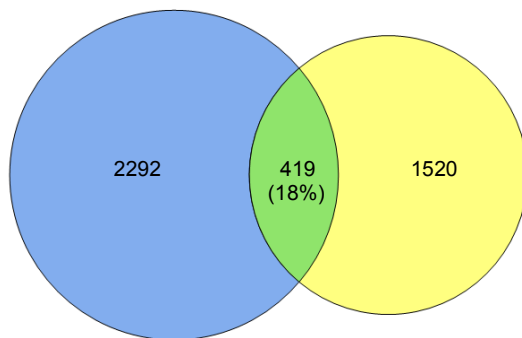

miR-205 uCCUUCAUuccaccggagucug
