# Supplementary material for: Functional and Evolutionary Significance of Human MicroRNA Seed Region Mutations
Source: PubMed Central journal article supplement (PMC4264867; doi:10.1371/journal.pone.0115241), 2014-12-12

Percent overlap

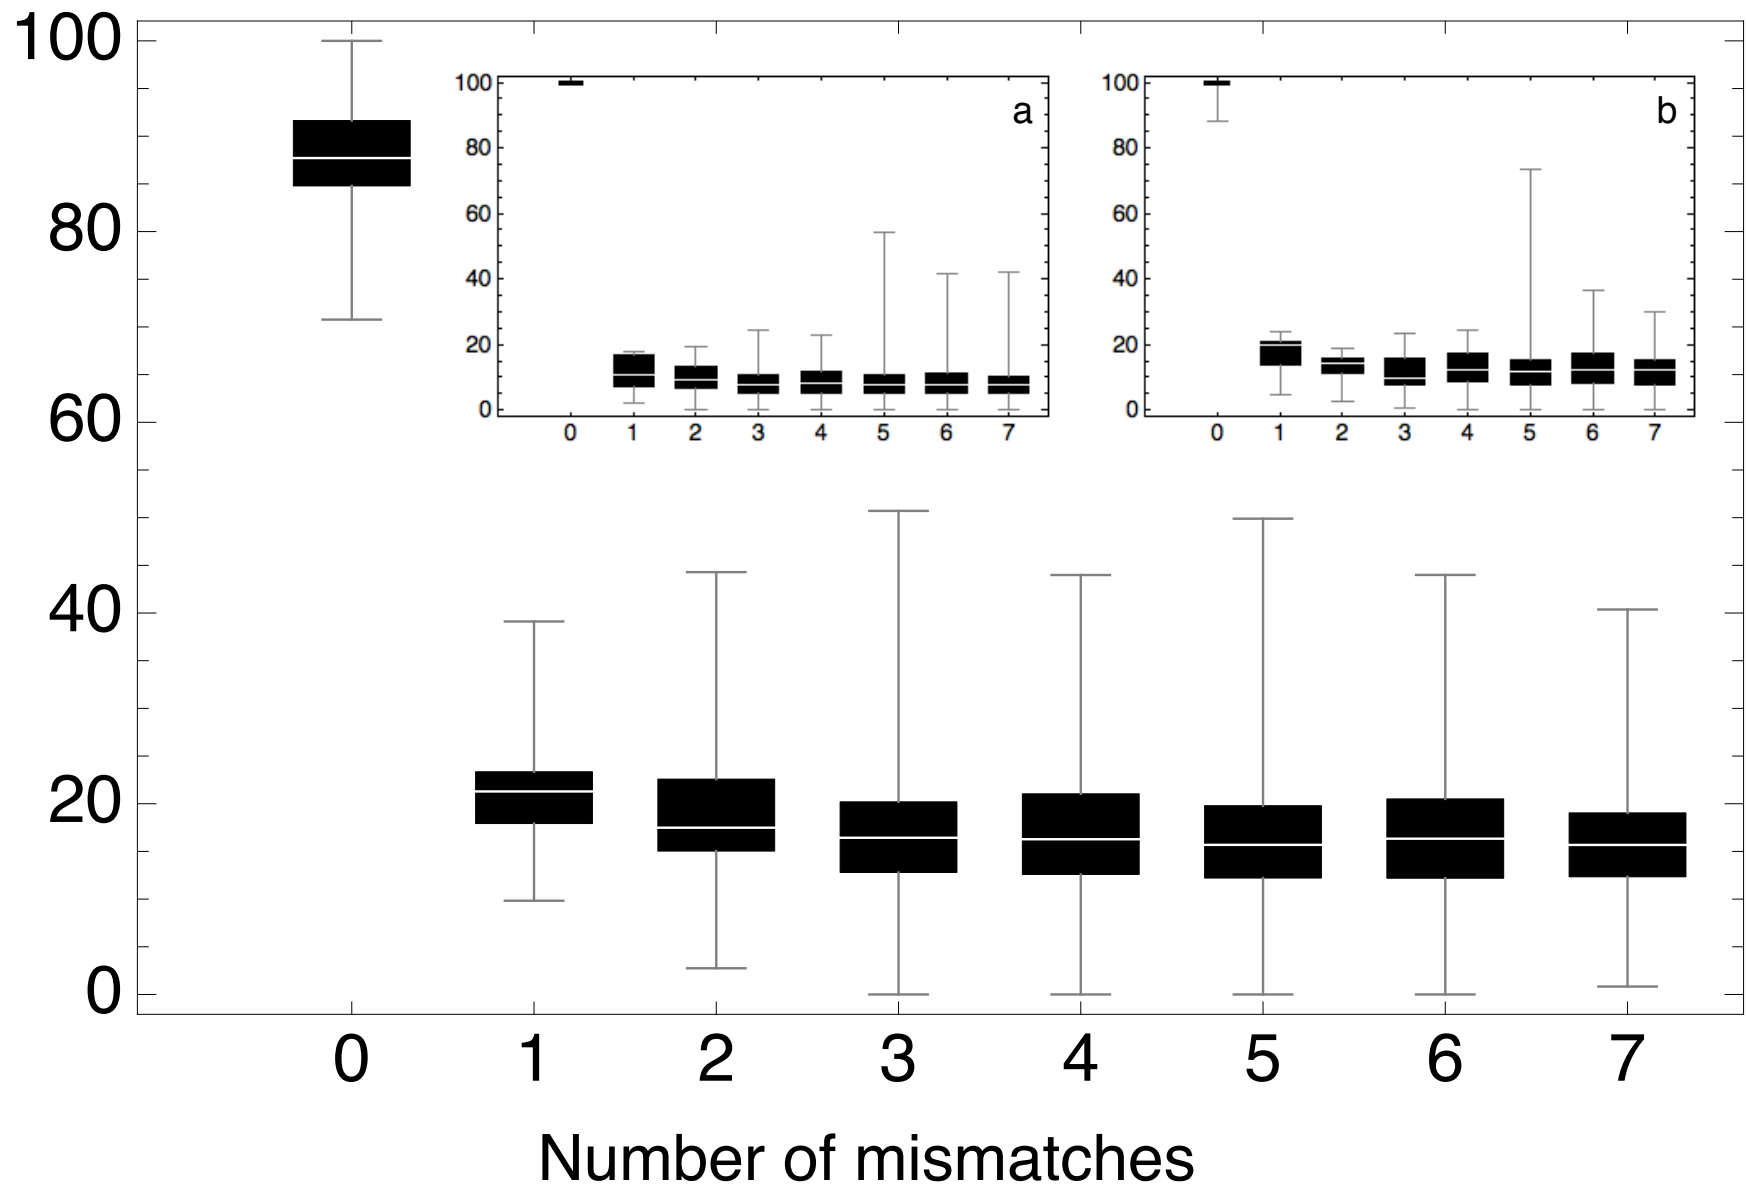

Supplement: pone.0115241.s002.pdf [file pone.0115241.s002.pdf]
